# Supplementary material for: An experimental and computational investigation of the elusive anhydrous form of Oxyma-B
Source: Royal Society of Chemistry journal article supplement (doi:10.1039/d3ce00741c), 2023-01-01
Supplement: d3ce00741c1.pdf [file d3ce00741c1.pdf]

# An Experimental and Computational Investigation of the Elusive Anhydrous form of Oxyma-B

**Rafel Prohens,<sup>\*a</sup> Rafael Barbas,<sup>a</sup> Beatriz G. de la Torre,<sup>d</sup> Fernando Albericio<sup>\*b,c,e</sup>  
and Antonio Frontera<sup>\*f</sup>**

<sup>a</sup> Unitat de Polimorfisme i Calorimetria, Centres Científics i Tecnològics, Universitat de Barcelona, Baldri Reixac 10, 08028 Barcelona, Spain.

<sup>b</sup> CIBER-BBN, Networking Centre on Bioengineering, Biomaterials and Nanomedicine, and Department of Organic Chemistry, University of Barcelona, Martí i Franqués 1-11, 08028 Barcelona, Spain.

<sup>c</sup> Institute for Advanced Chemistry of Catalonia (IQAC-CSIC), 08034 Barcelona, Spain

<sup>d</sup> KwaZulu-Natal Research Innovation and Sequencing Platform (KRISP), School of Laboratory Medicine and Medical Sciences, College of Health Sciences, University of KwaZulu-Natal, Durban, KwaZulu-Natal 4041, South Africa.

<sup>e</sup> Peptide Science Laboratory, School of Chemistry and Physics, University of KwaZulu-Natal, Westville, KwaZulu-Natal 4000, South Africa

<sup>f</sup> Departament de Química, Universitat de les Illes Balears, Crta. de Valldemossa km 7.5, 07122 Palma, Spain.

## Electronic Supplementary Information

|                                                                           |    |
|---------------------------------------------------------------------------|----|
| 1. Characterization of the solids .....                                   | 2  |
| 2. List of 30 solvents used in the crystallization battery at 25 °C ..... | 10 |
| 3. Structure Determination from Direct Space Methods .....                | 11 |
| 4. CSD Survey of supramolecular synthon .....                             | 14 |



# 1.- Characterization of the synthesis product of Oxyma-B

Figure S1: DSC of Oxyma-B (synthesis product) at a heating rate of 10 °C/min.

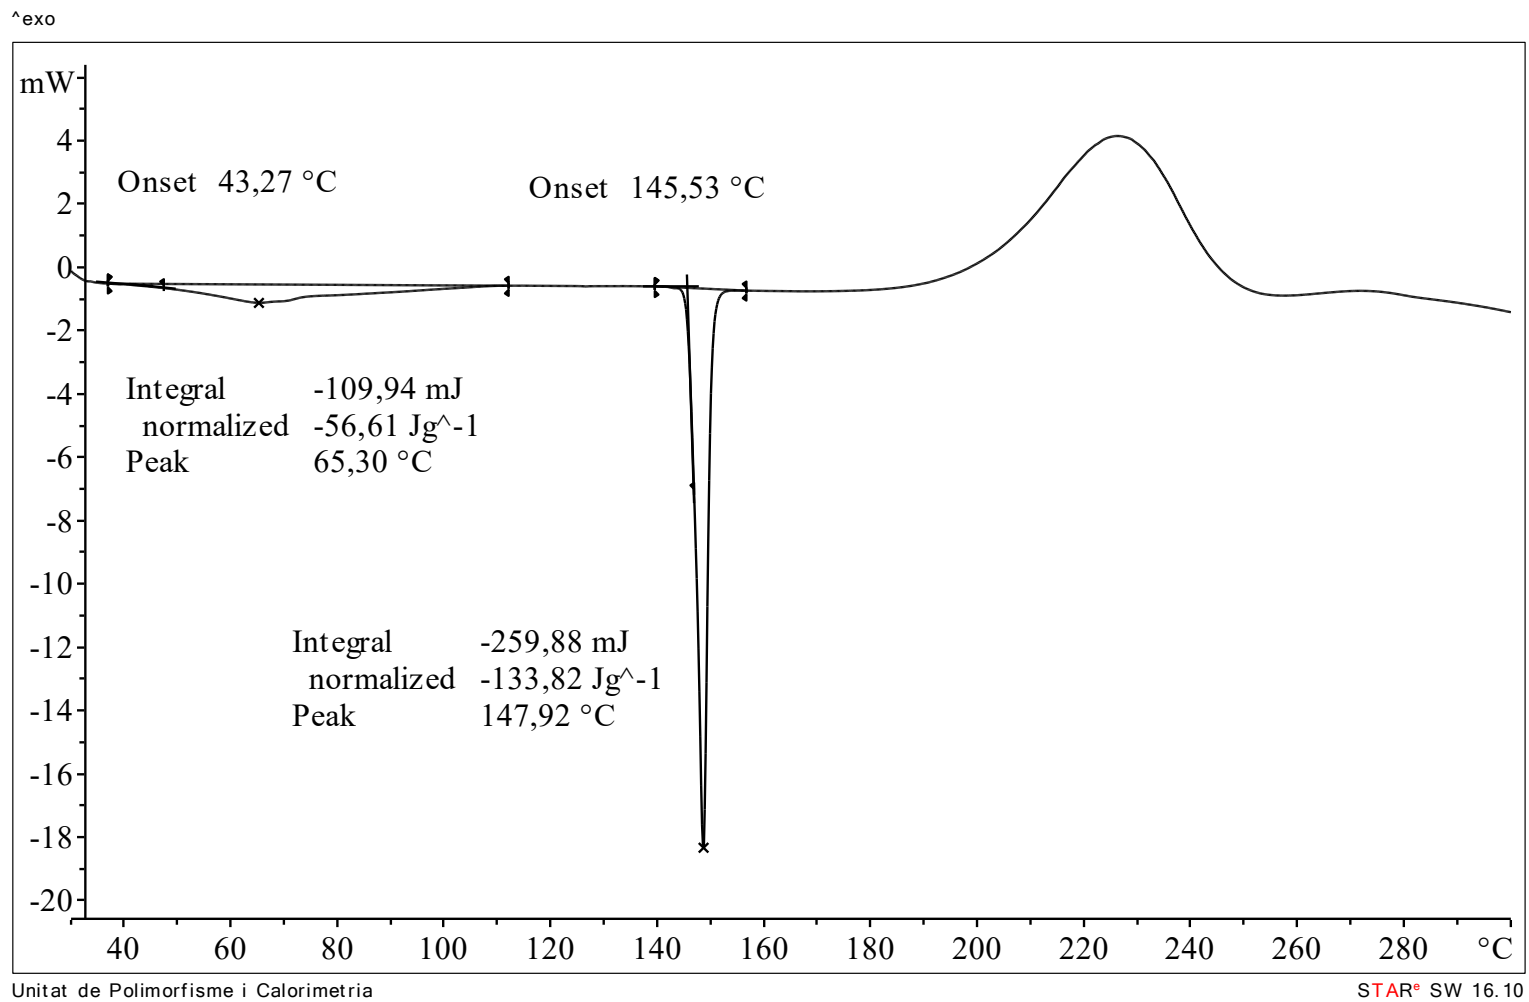

**Figure S2:** TGA of Oxyma-B (synthesis product).

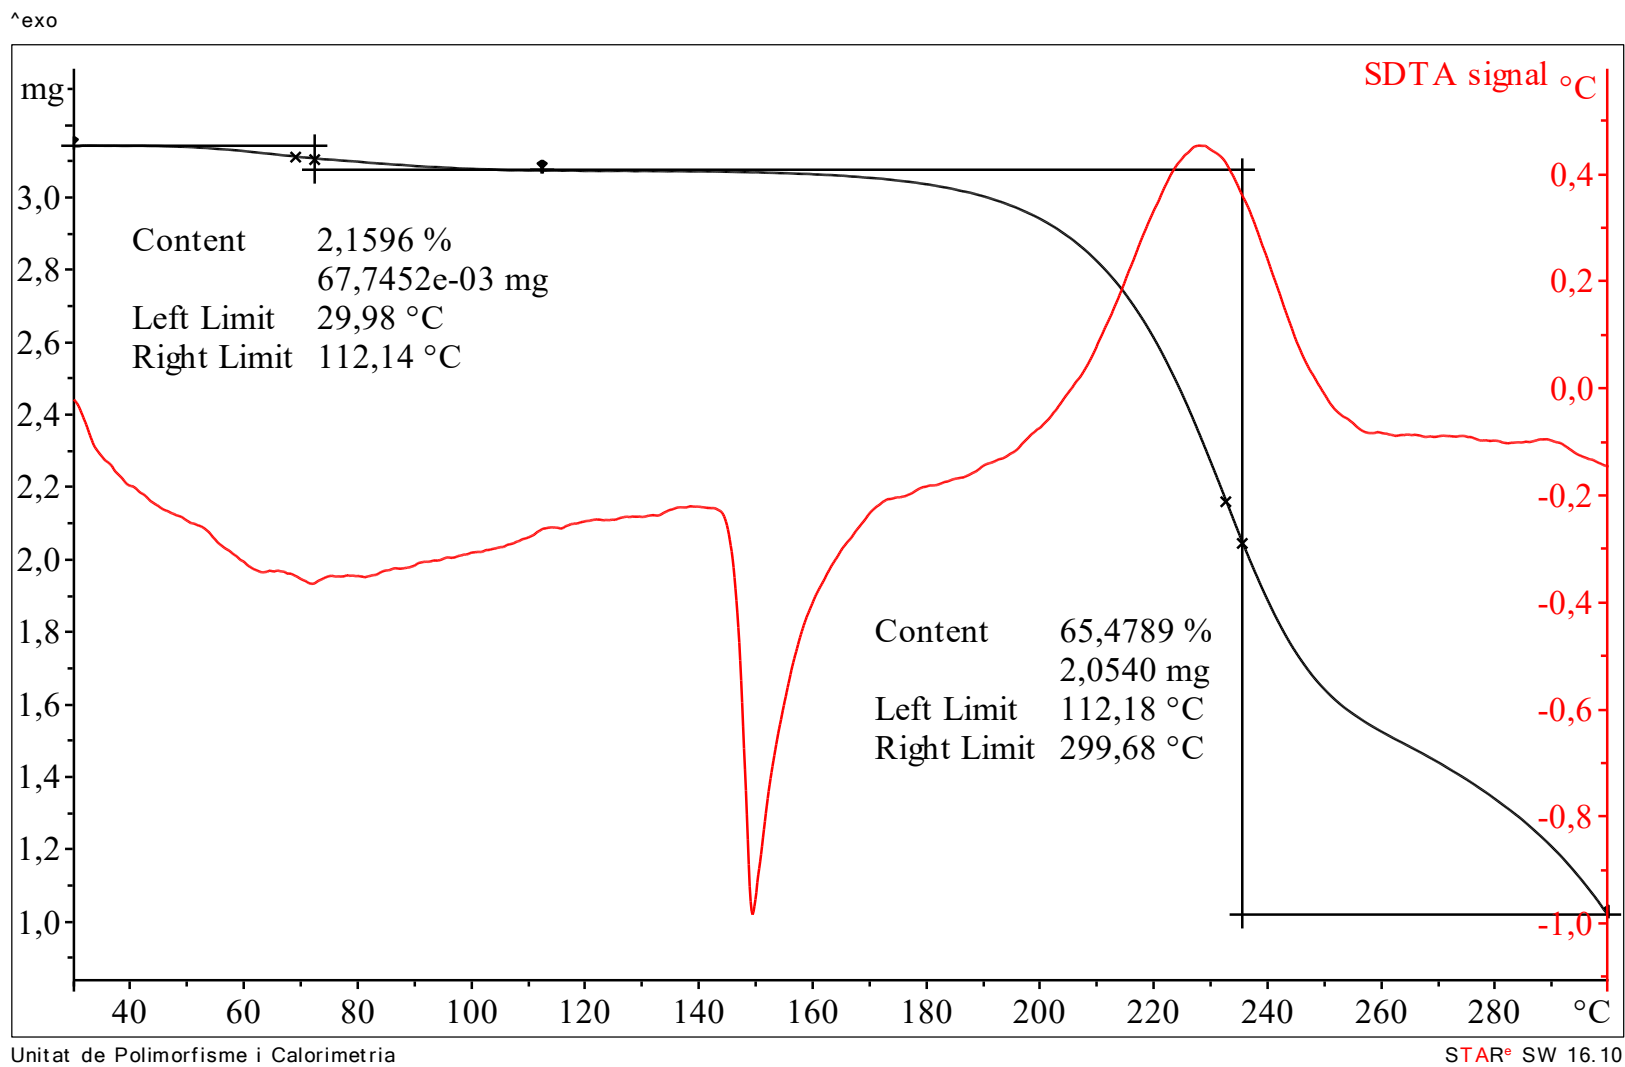

**Figure S3:** XRPD of Oxyma-B (synthesis product).

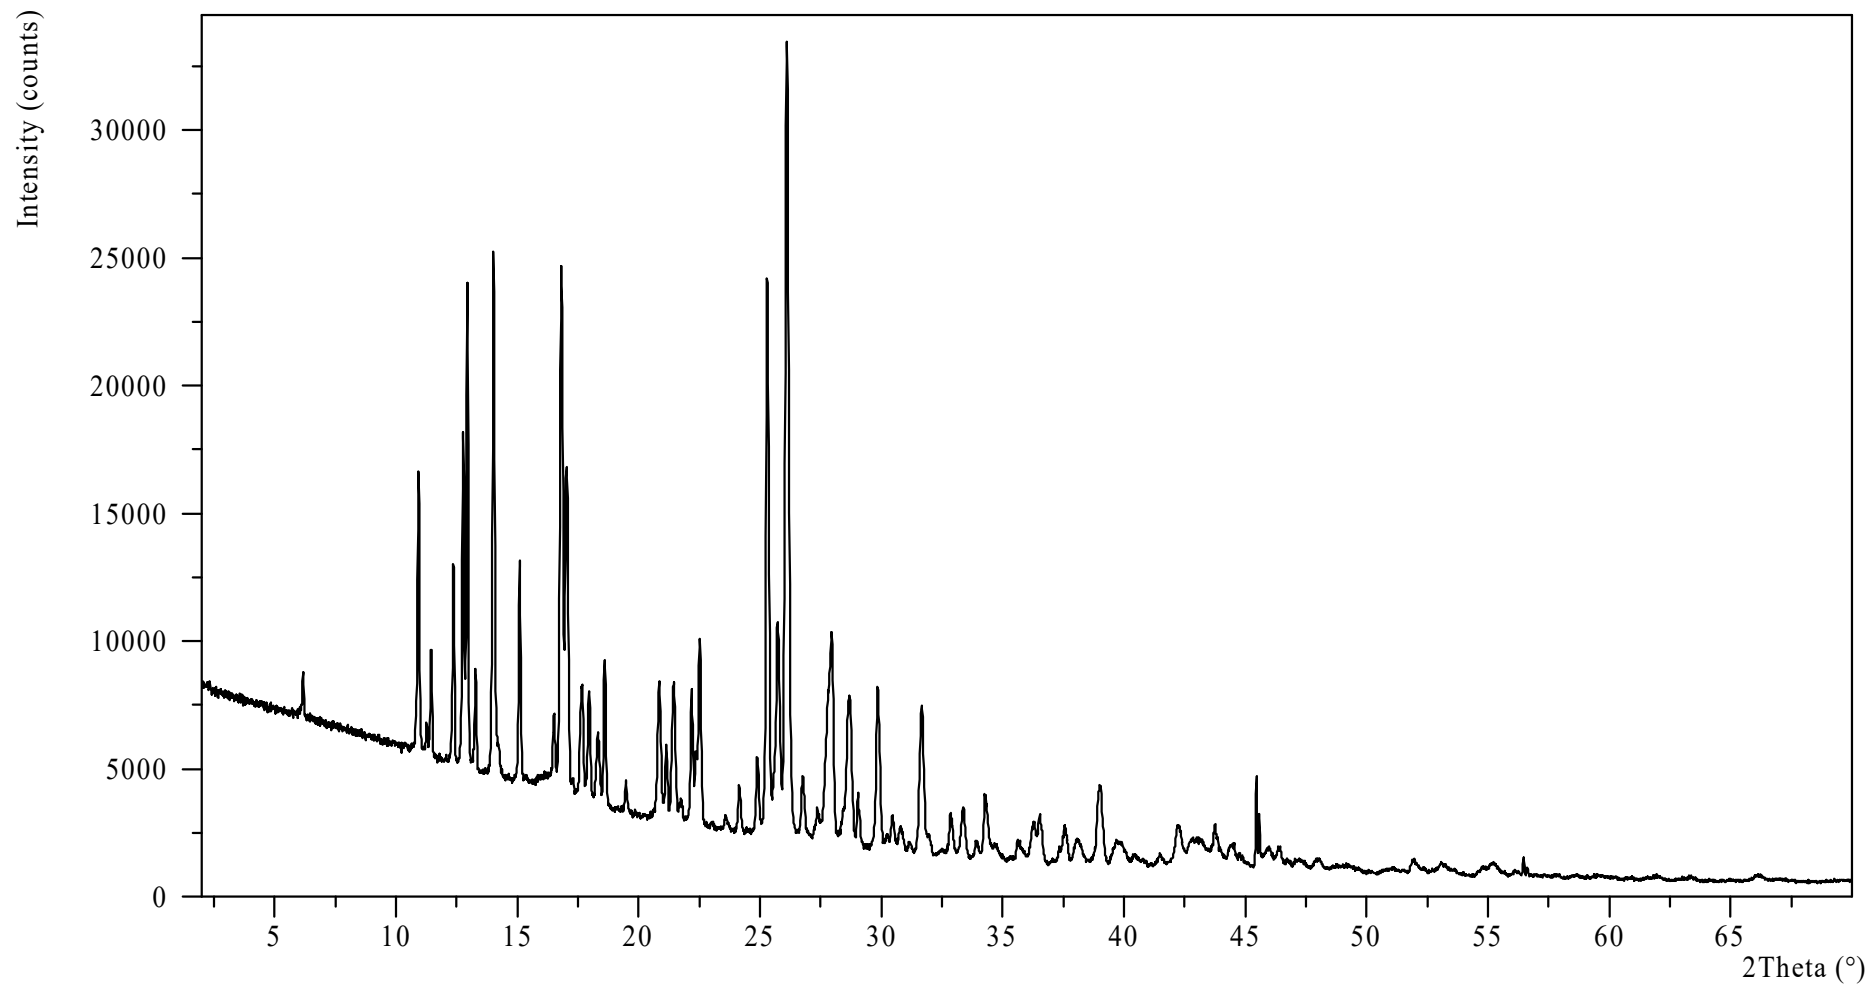

**Figure S4:** Comparative XRPD diffractograms of Oxyma-B (synthesis product) bulk powder (black) and monohydrate Oxyma-B (CCDC refcode WOWFUL) simulated from the cif file (green).

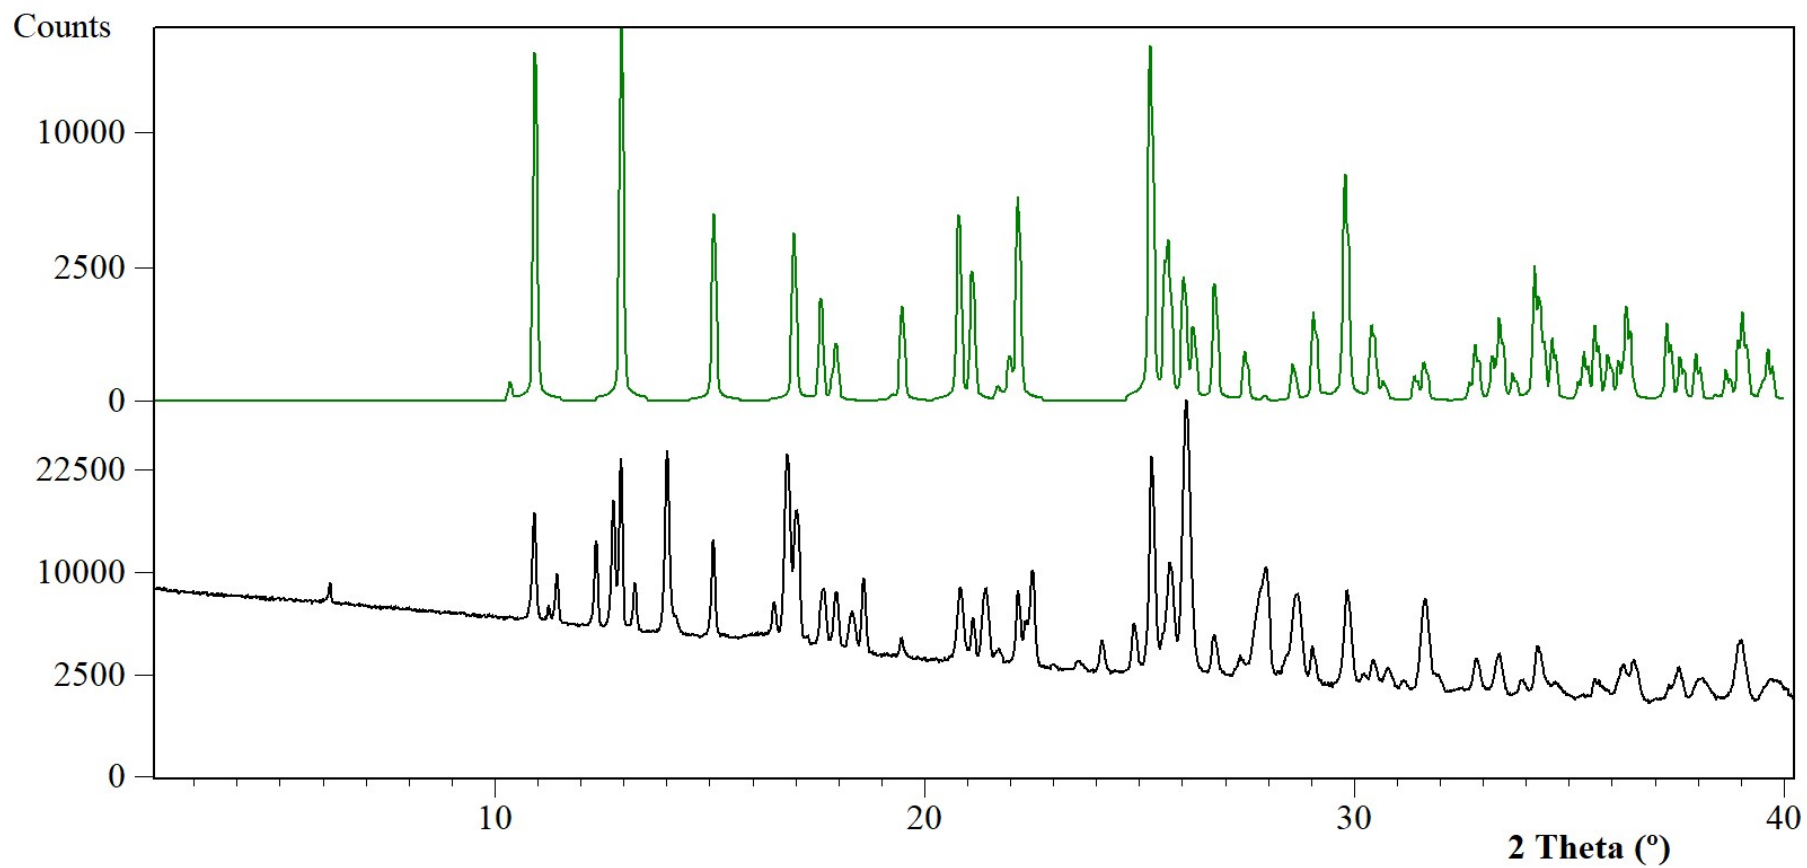

**Figure S5:** DSC of Oxyma-B (synthesis product) at a heating rates of 10 °C/min and 1 °C/min.

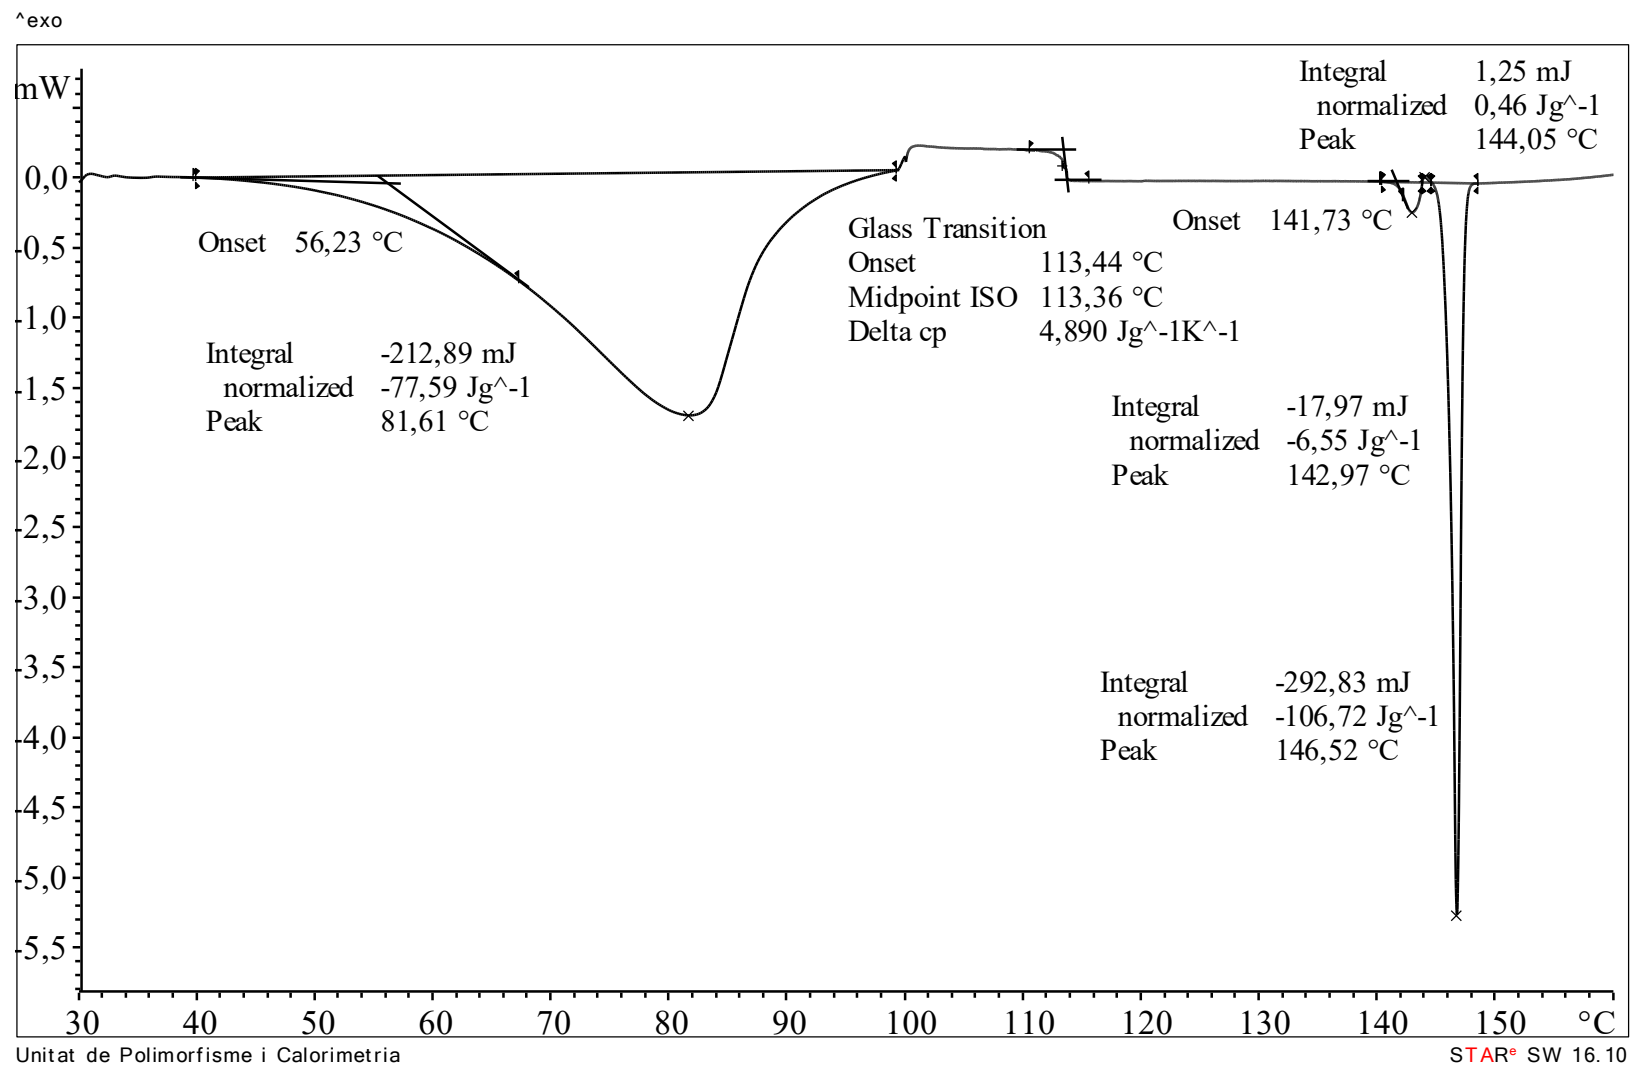

**Figure S6:** ADSC modulated heat flow curve of Oxyma-B (synthesis product) at a heating rate of 1 °C/min with a modulation period and an amplitude of 60 s and 1 °C, respectively.

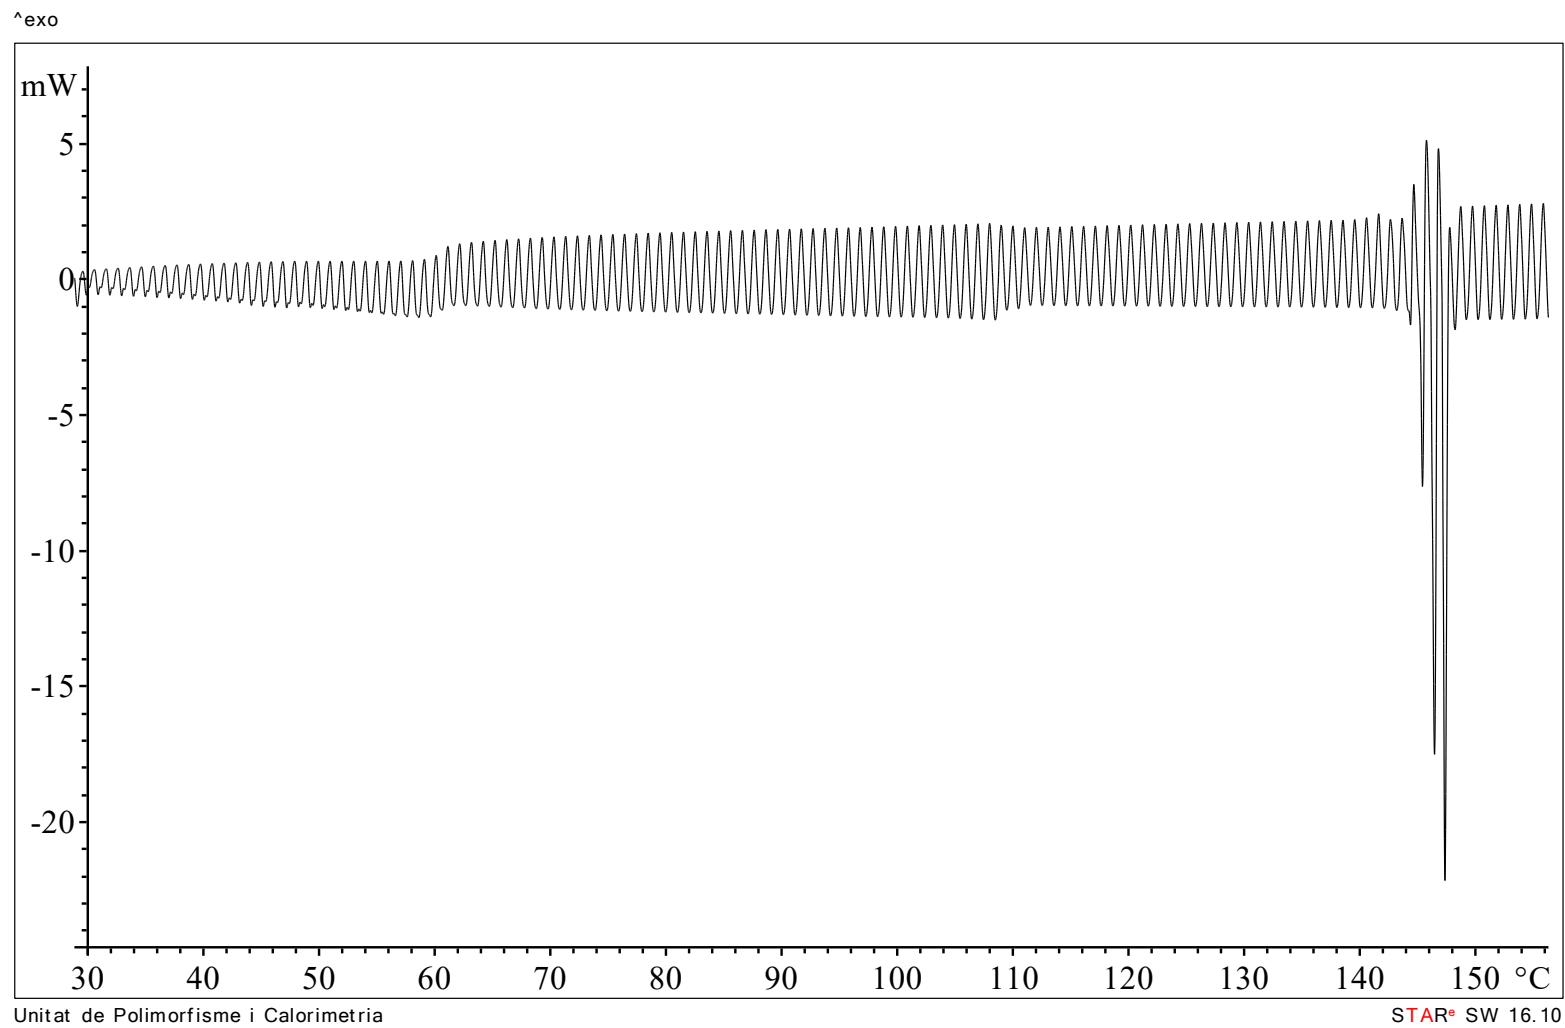



**Figure S7:** DVS sorption curves (a) and DVS isotherms (b) of Oxyma-B (synthesis product).

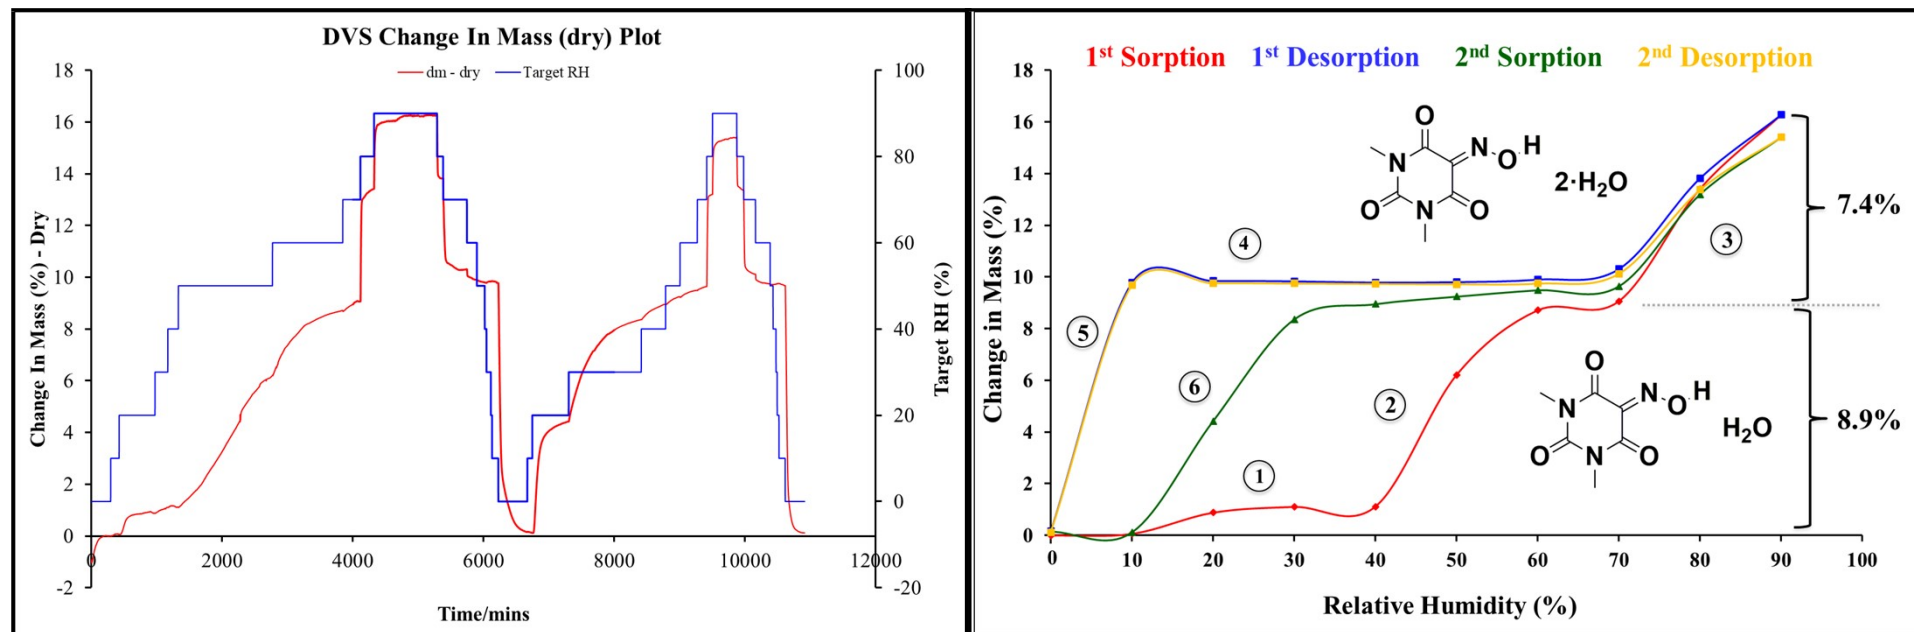

(a)

(b)

**Figure S8:** Comparative XRPD diffractograms of Oxyma-B (synthesis product) bulk powder (red), Oxyma-B (heated until 125 °C during 10 minutes) powder (black) and monohydrate Oxyma-B (CCDC refcode WOWFUL) simulated from the cif file (green).

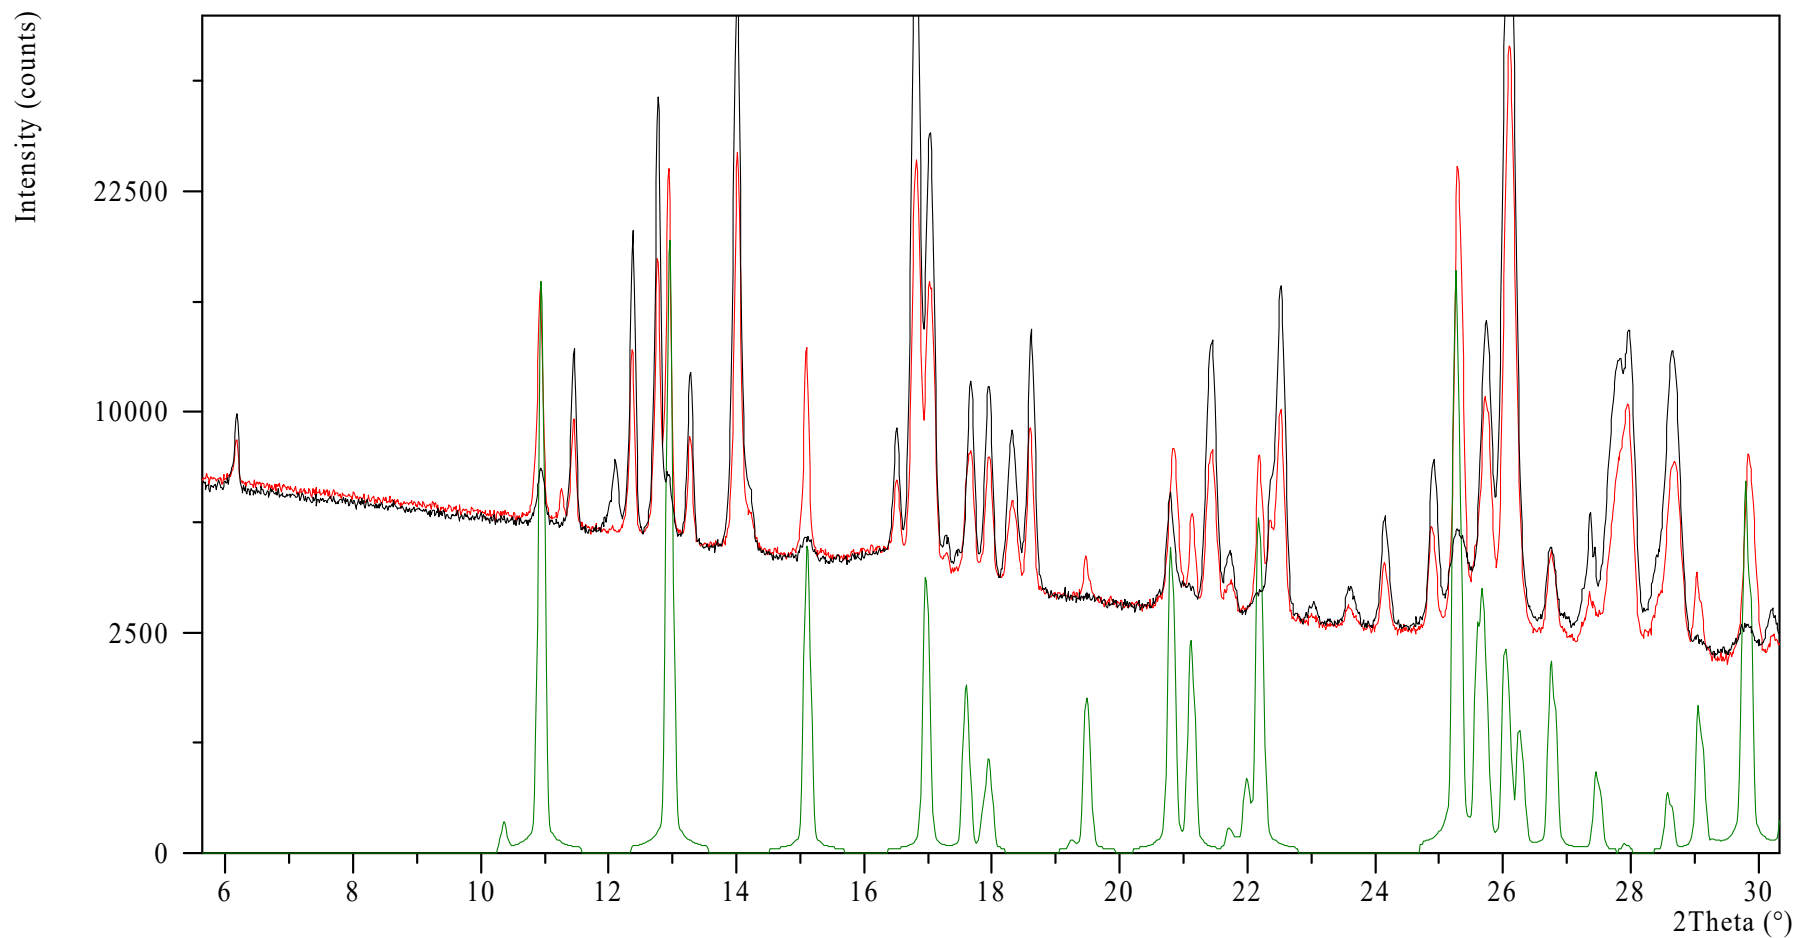

## **2.- List of 30 solvents used in the crystallization battery at 25 °C**

Methanol, ethanol, IPA, butanol, formic acid, ethylene glycol, dimethyl ethylene glycol, benzyl alcohol, ACN, MEK, acetone, MiBK, water, DMF, DMSO, AcOEt, THF, dioxane, dichloromethane, chloroform, acetic acid, NH<sub>3</sub> (32 %) in water, diethylamine, toluene, xylene, heptane, cyclohexane, pentane, diethyl ether and diisopropyl ether.

### 3.- Structure Determination from Direct Space Methods

**Figure S9:** PRF plot showing the Le Bail fit of the XRPD pattern of anhydrous Oxyma-B. The plot shows the experimental powder XRD profile (red marks), the calculated powder XRD profile (black solid line), the difference profile (blue lower line) and Bragg positions (green lines).

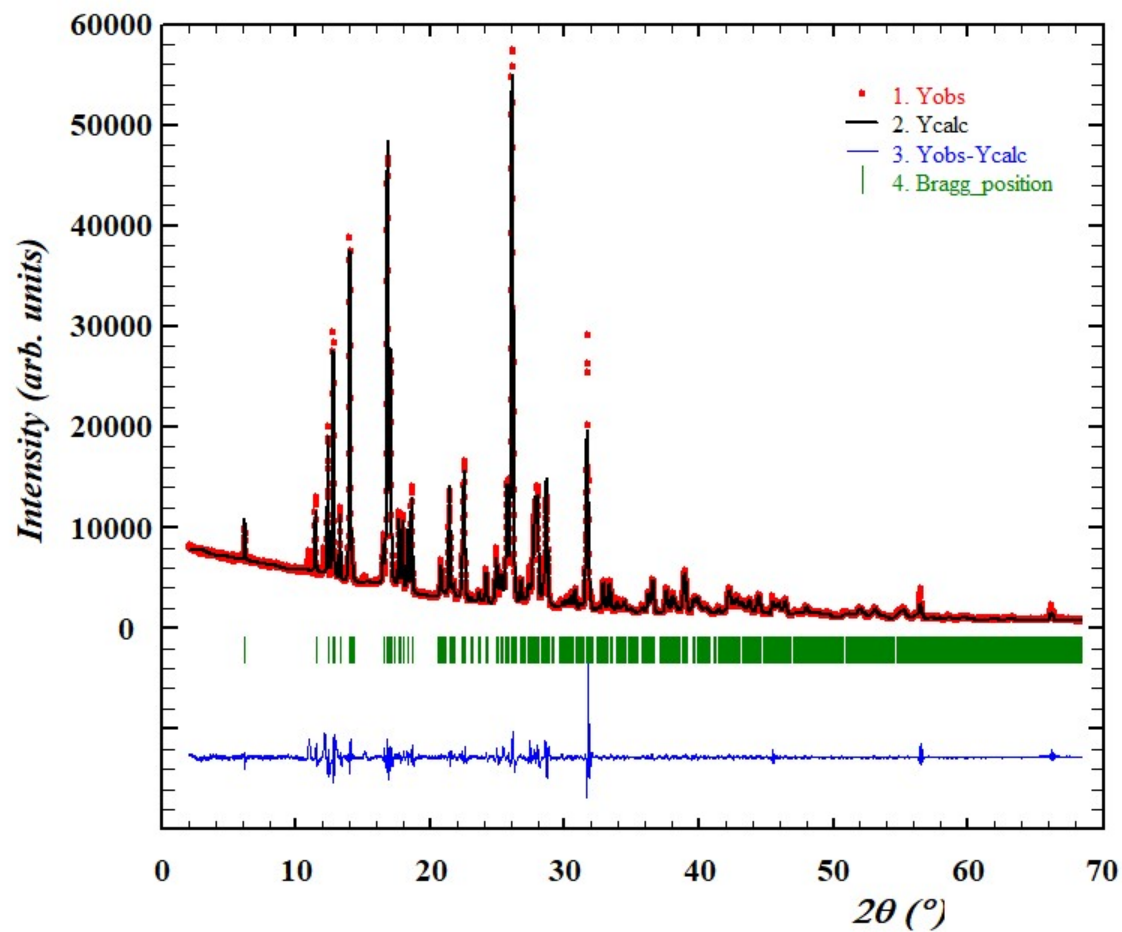

**Figure S10:** Overlay of the asymmetric unit molecules between the best FOX solution (black) and DFT-D with fixed cell parameters (colour by Element)

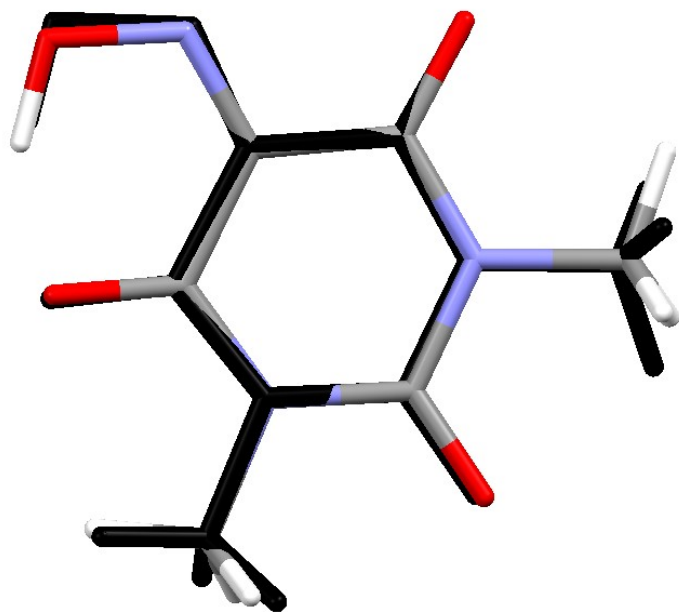

**Molecule 1**

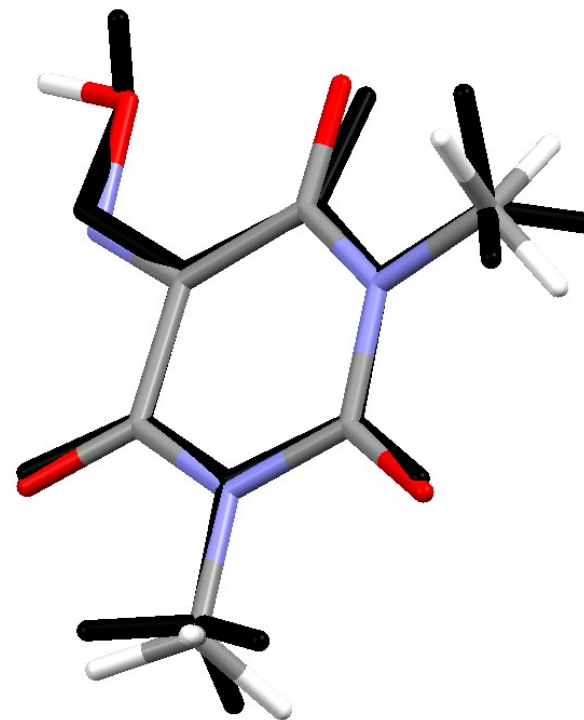

**Molecule 2**

**Figure S11:** Comparative of asymmetric unit molecules: final cif deposited (colour by Element) and after validation procedure (green) with DFT geometry optimization

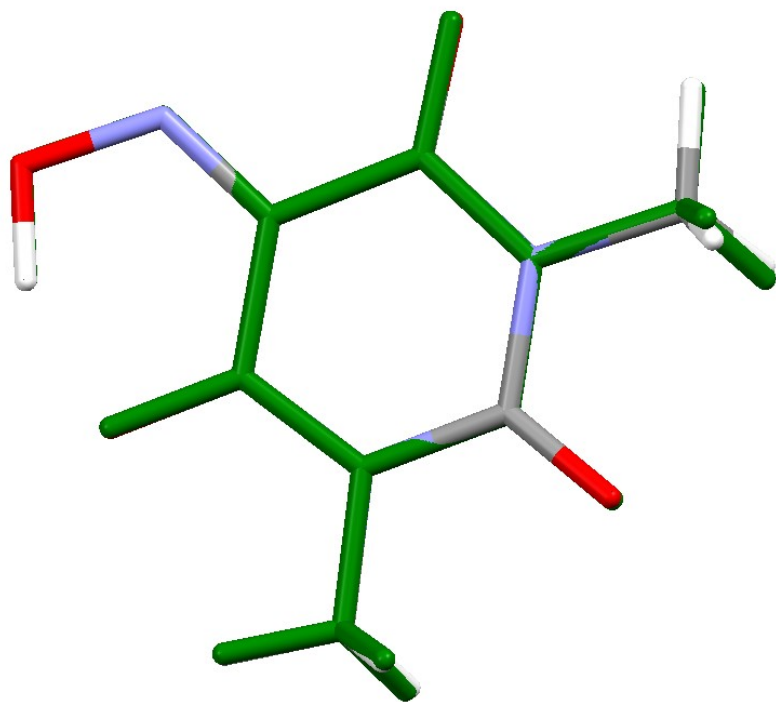

**Molecule 1 (RMSD: 0.0391)**

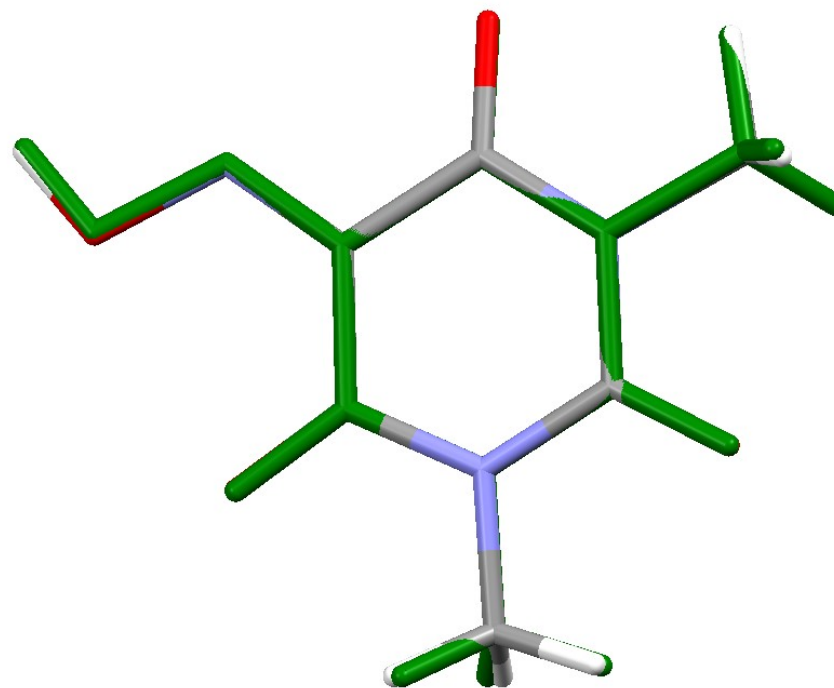

**Molecule 2 (RMSD: 0.0267)**

#### 4.- CSD survey of supramolecular synthons

**Table S1.** List of CSD refcodes showing the supramolecular synthons searched. Search filters of structures containing only determined atomic coordinates and without organometallic compounds have been applied. Supramolecular synthon  $R_1^2(5)$  (blue), intramolecular  $R_1^1(6)$  interaction motif (red) and molecules with conformation as molecule 2 but showing different intermolecular interactions (black).

| Search                                                                                                                                                                                                                                                                                                          |                                                                                                                                                                                                                                                                                                         |
|-----------------------------------------------------------------------------------------------------------------------------------------------------------------------------------------------------------------------------------------------------------------------------------------------------------------|---------------------------------------------------------------------------------------------------------------------------------------------------------------------------------------------------------------------------------------------------------------------------------------------------------|
| 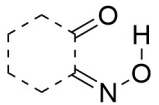<br>--- means any bond                                                                                                                                                                                                         |                                                                                                                                                                                                                                                                                                         |
| CCDC                                                                                                                                                                                                                                                                                                            |                                                                                                                                                                                                                                                                                                         |
| <p> <b>CAGFOJ</b><br/> <b>BNPQOX</b><br/>           CLEBQI<br/>           DOXROX02<br/>           DOXROY<br/> <b>FAGYUL</b><br/> <b>GEXQOR</b><br/>           KNQXSO<br/>           MNTRPH<br/> <b>MURJEQ</b><br/> <b>NANGEO</b><br/>           NQOXSX<br/>           NQXSLA<br/>           NQXSNK         </p> | <p>           NTSHQS<br/> <b>PBZQOX</b><br/> <b>SNQUOX</b><br/>           SNQXSO<br/>           UJESEH<br/> <b>VIRDEH</b><br/> <b>XOHMUC</b><br/> <b>XOHNAJ</b><br/>           YIBGIZ<br/> <b>YIBGOF</b><br/>           ZAMKIH<br/> <b>ZATKUA</b><br/> <b>ZIVJAP</b><br/>           ZIVJET         </p> |
| <br><div style="display: flex; justify-content: space-around; width: 100%;"> <span><b>CAGFOJ</b></span> <span><b>GEXQOR</b></span> </div>                                                                                    |                                                                                                                                                                                                                                                                                                         |
